# Supplementary material for: Fungal Immunomodulatory Protein from Nectria haematococca Suppresses Growth of Human Lung Adenocarcinoma by Inhibiting the PI3K/Akt Pathway
Source: MDPI journal article supplement (doi:10.3390/ijms19113429), 2018-11-01
Supplement: s1 [file s1]

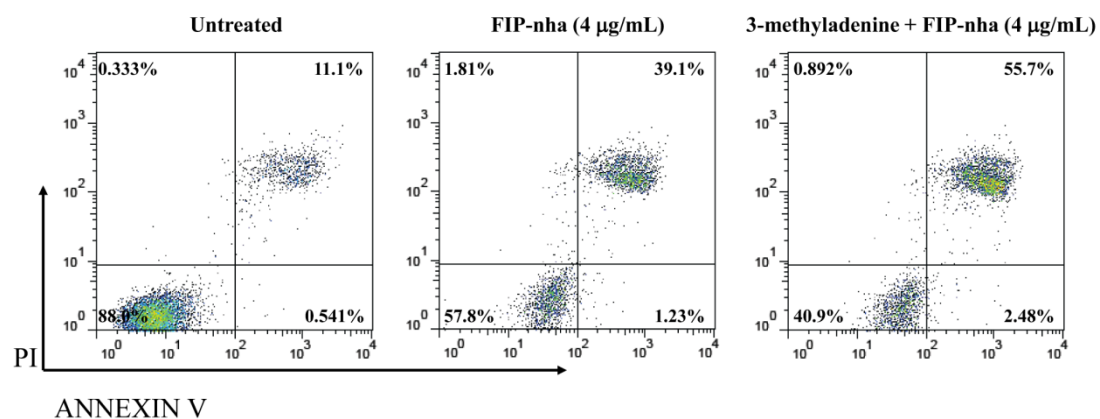

**Figure S1.** Effects of 3-methyladenine on the apoptosis of A549 cells. The cells were treated with or without FIP-nha (4 µg/mL) and 3-methyladenine (1 mmol) for 24 h. All of the apoptotic levels were labeled using Annexin V-FITC and PI and determined by flow cytometry.
